# Supplementary material
Source: Springer Nature journal article supplement (https://www.springermedizin.de/resource/supplementary/12889_2014_6753_MOESM4_ESM.pdf/9498984)

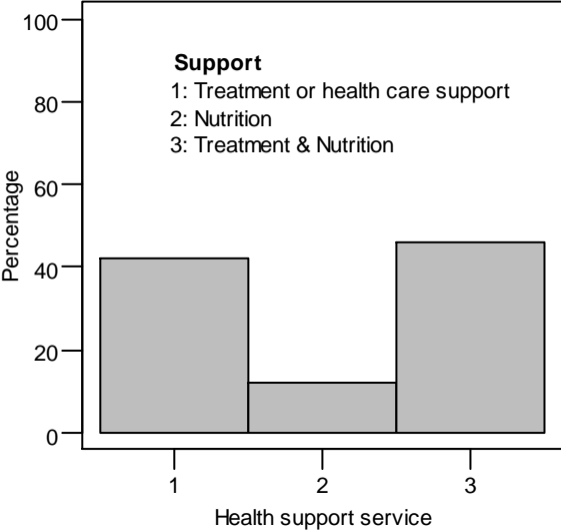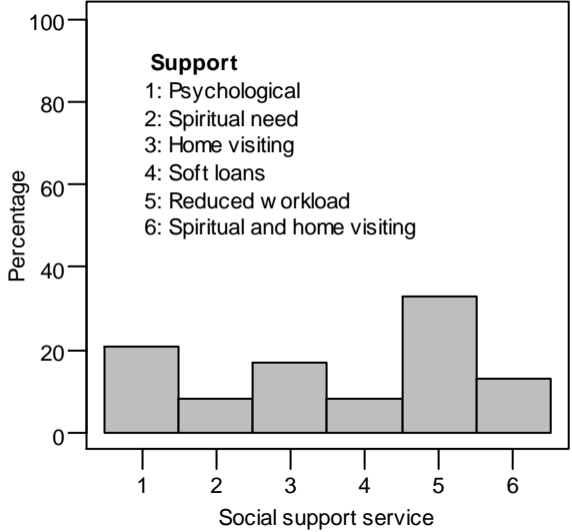

Supplement: MOESM4 [file 9498984]
